# Supplementary material
Source: PubMed Central journal article supplement (PMC3845104)
Supplement: 1314382110_sapp.pdf [file 1314382110_sapp.pdf]

# Identifying External Influences on Global Precipitation

## Supporting Information

### S1 Model Output

We use model output from the 3rd [1] and 5th [2] phases of the Coupled Model Intercomparison Project (CMIP3/5). All data is available for download via the Earth System Grid (see <http://cmip-pcmdi.llnl.gov> for further information). Tables S2 and S3 list the official acronyms and modeling center information for all models used in this study. In CMIP5, we analyzed:

**Historical** simulations with estimated changes in anthropogenic and natural forcings over the period 1979-2005 inclusive.

**RCP8.5** simulations in which 21st century changes in greenhouse gases and anthropogenic aerosols are prescribed according to the Representative Concentration Pathway 8.5 [3], generally over the period 2005-2012

**piControl** simulations: pre-industrial runs with no changes in external climate forcings

**historicalNat** simulations with estimated changes in natural forcings only over the period 1979-2005

Table S4 lists the CMIP5 historical and RCP8.5 simulations used, along with the unique tracking identifier found in the metadata. Table S5 lists the control runs, tracking ids, and the total length of each control run used in this study. To prevent models with longer runs dominating our calculation of internal noise, we use only the first 200 years of every model control simulation.

Of the data available in the CMIP3 archive, we analyzed

**Historical** simulations with estimated changes in anthropogenic and natural forcings over the period 1979-2000

**A1B** experiments in which emissions are increased according to Standard Reference Scenario A1B corresponding to a medium-high emissions trajectory [4].

Approximately half of the CMIP3 models include anthropogenic stratospheric ozone depletion as an external climate forcing [5]. These models are indicated in Table S6.

The pre-industrial control runs used do not incorporate changes in external anthropogenic or natural forcings. As such, they provide information about internal variability of the climate system. We have established that the observed trends are very unlikely to result from this internal variability alone, and is consistent with externally forced model results. However, external forcings can be divided into two categories: anthropogenic forcings, such as increased GHG concentrations or stratospheric ozone depletion, and natural forcings due to volcanic activity or solar variability. In order to ascertain the roles of natural and human forcings, we use the CMIP5 historicalNat experiments, which incorporate observed changes in natural external forcings but not anthropogenic contributions. The vast majority of these experiments end in December 2005, meaning we must test 26-year trends over the period 1979-2005. Table S7 lists the historicalNat simulations used in this study.

## S2 Splicing

For extended analysis, CMIP5 historical simulations are combined with RCP8.5 runs, and CMIP3 historical simulations with A1B runs. In CMIP5, model metadata are checked and a spliced file is created provided:

- The designated parent experiment of the RCP8.5 run is historical
- The ensemble member identifiers (as defined in the CMIP5 Data Reference Syntax Document) of the RCP8.5 run and indicated parent match
- Historical experiments end in December 2005 (November 2005 for Hadley Centre models)
- RCP8.5 experiments begin January 2006.

Imposing these criteria excludes several available models from the splicing process; those used in this study are listed in Table S4.

## S3 Observational Datasets

We used version 2.2 of the Global Precipitation Climatology Project (GPCP) dataset [6], available at <http://www.esrl.noaa.gov/psd/data/gridded/data.gpcp.html>. This dataset consists of monthly means from January 1979-January 2013. Because we considered boreal winter (DJF) seasonal means and required that all three months be present, we used 33 years of winter mean data. The observational data is gridded to a 2.5x2.5 degree latitude-longitude grid, which is sufficiently highly resolved to detect shifts in the latitudes of zonal mean precipitation features. GPCP is also the most reasonable dataset over ocean [7]. The dataset is believed to be more reliable post-1988, when measurements from the Special Sensor

Microwave Imager (SSM/I, [8]) begin to be incorporated [9]. Figure S1 shows the observed signal-to-noise ratio, calculated from GPCP-derived thermodynamic and dynamic indicators, as a function of the trend start year. Even when the preceding years are excluded from the record, the 1988-2012 trend remains significant at the 95% confidence level.

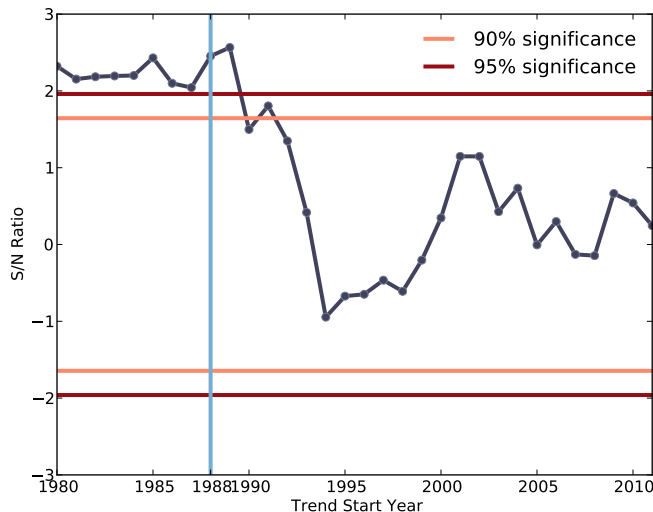

Figure S1: Signal-to-noise ratio as a function of trend start time. All trends end in 2012.

To regress out the effects of ENSO (Section S8), we used the historical monthly Niño 3.4 index (defined as the average sea surface temperature in the region bounded by 5°North-5°South and 170-120°West) available at <http://www.cpc.ncep.noaa.gov/data/indices/>.

## S4 Observed and Modeled Time Series

We apply scale-space smoothing with smoothing parameter 5 degrees to December-February (DJF) seasonal precipitation climatologies. Considering a single season is useful because expected thermodynamic and dynamic trends vary with the seasonal cycle; DJF is chosen because dynamic changes are expected to be largest in boreal winter [5, 10]. The smoothing is performed via diffusion on the sphere as discussed in [11]. This choice of smoothing method removes fine-scale variability, preserves the native model grid, and does not introduce new structure into the map as an artifact of the smoothing procedure. The resulting smoothed fields are then zonally averaged, yielding a simple picture of the latitude structure of global precipitation.

All models have exactly five extrema in the 30-year mean DJF climatology, and most models have exactly five extrema for every individual year. To handle those that do not, we adopt the following procedure: for each model year, if more than five extrema are found, only the three(two) maxima(minima) closest to the maxima(minima) in the 30-year average

are retained. Similarly, if fewer than five extrema are found, only those extrema closest to the 30-year mean values are retained; the other points are masked.

## S5 Fingerprint Analysis

What is the estimated response of the climate system to external forcing? Various methods exist to determine the fingerprint of climate change (see, e.g., [12, 13, 14, 15, 16]). We adopt the methods used in e.g. [17], in which the fingerprint is defined as the first empirical orthogonal function (EOF) of the spatiotemporal data matrix that results from averaging the CMIP5 historical/RCP8.5 data, first over an individual model’s realizations, if more than one is available, and then over all models. In the case of  $D'_H(t)$ , the anomalies in the latitudes of local extrema in the zonal average, along with the half-max points, measure the dynamic changes due to natural and externally forced variability. The double average over realizations and models damps internal variability, because manifestations of random natural phenomena such as ENSO are uncorrelated across models. This means that the resulting average  $\overline{D'_H(t)}$  in theory measures changes in the locations of extrema resulting primarily from externally forced variability. The same holds for the averaged thermodynamic changes  $\overline{T'_H(t)}$ , which yields a picture of the response of precipitation intensity to external forcing.

In this paper, the climate change fingerprint is taken to be the first multivariate EOF of  $\tilde{D}'_H(t)$  (11 spatial dimensions) and  $\tilde{T}'_H(t)$  (5 spatial dimensions). The tildes indicate that the input time series have been scaled to unit variance before input. The first EOF is then the eigenvector corresponding to the 16x16 covariance matrix obtained by first concatenating  $\tilde{D}'_H(t)$  and  $\tilde{T}'_H(t)$  along their spatial dimensions. The expansion coefficients of the first EOF form a time series: the first principal component. These coefficients show how the primary mode of variability oscillates in time.

## S6 Single-variable fingerprints

In this section, we calculate the first empirical orthogonal functions (EOF) of the multi-model average  $\overline{D'_H(t)}$  and  $\overline{T'_H(t)}$  and their corresponding principal components (Fig S2a-d).

Figure S2a shows that in boreal winter the leading dynamic response to external forcing,  $F(D)$ , is characterized by poleward expansion in both hemispheres, especially in the storm tracks and on the poleward flank of the dry zones, consistent with previous studies, e.g. [18]. The associated principal component shows a positive trend (Figure S2b), indicating that this response is more strongly expressed over time. Figure S2c indicates that the primary thermodynamic response to forcing, denoted  $F(T)$ , shows the wet-get-wetter, dry-get-drier pattern dictated by the Clausius-Clapeyron relation in a warming world. As for the dynamic indicator, the first principal component (Figure S2d) has a positive trend.

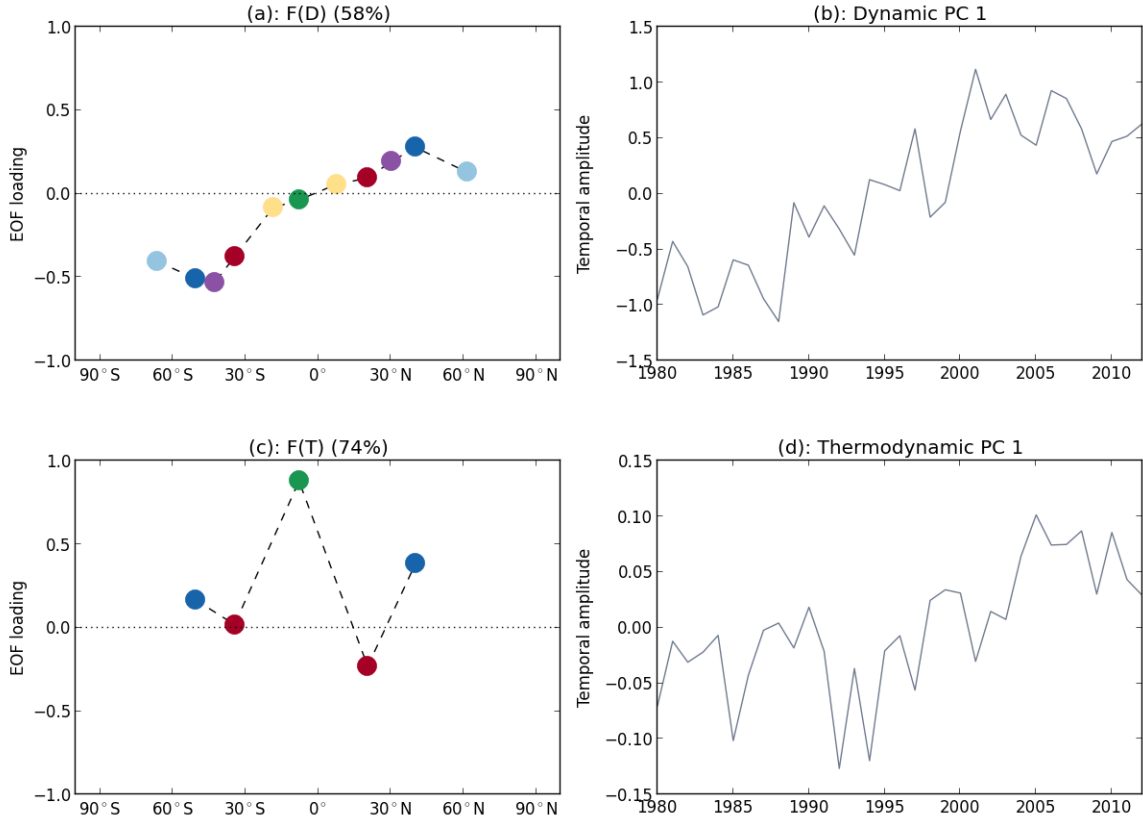

Figure S2: Single-variable fingerprints and first principal components for (a-b): the dynamic indicator  $\overline{D'_H(t)}$  and (c-d): the thermodynamic indicator  $\overline{T'_H(t)}$ .

## S6.1 Observed dynamic trends

Figure S3a shows the projection of the *observed* dynamic indicator  $D'_O(t)$  onto the fingerprint  $F(D)$  and the trend, obtained by least-squares regression. This projection should not be confused with the principal component in Figure S2b, which expresses the strength of the fingerprint in the multimodel average and involves no observational data. The corresponding signal-to-noise ratio, obtained by dividing the trend by the standard deviation of the control distribution, is shown in Figure 3b, as well as fitted probability density functions for the pre-industrial control (blue), ALL5 (green), ALL3 (cyan), and NoOz3 (orange) S/N ratios. As expected, the three forced distributions are offset significantly (Table S1) from the control distribution, which is centered around zero. ALL5 and ALL3 trend distributions do not differ significantly from each other (see Table S1) and are both shifted toward the positive values, indicating that the poleward shift characteristic of  $F(D)$  is present in both classes of models. The NoOz3 distribution differs from the ALL3 and ALL5 distribution and has smaller mean trend. This is expected: increased GHG concentrations and stratospheric ozone depletion both contribute to poleward expansion of the general circulation [10, 19, 20] and models that include both forcings will exhibit stronger trends. The observed S/N ratio of 3.83 is significant at the 5% level (Figure S3b). This indicates that the observed trend in the dynamic indicator is very unlikely to result from internal variability alone. However, the observed S/N ratio lies in the far right tail of all three forced distributions, and is thus also highly unlikely to be compatible with the models' estimate of the dynamic precipitation response to forcing. This is consistent with previous literature, e.g. [5, 21, 22] that suggests the observed expansion of the tropical Hadley cell exceeds model results by an order of magnitude. We therefore detect a dynamic change in precipitation, but are unable to attribute it to any particular forcing or combination of forcings using the current generation of models.

### S6.1.1 Comparison with previous studies

Observed dynamic changes appear to be robust across numerous variables such as the jet stream and accompanying storm tracks [23], the Southern Annular Mode [24, 25, 26], the Hadley cell edge calculated from the meridional overturning stream function [27], and the expansion of dry zones determined from zeros of precipitation minus evaporation [28]. These observed dynamic shifts, particularly the widening of the tropical belt, are larger than those predicted by models [5, 21, 22]. This discrepancy between models and observations is not well understood and appears highly sensitive to the metric used [29]. The discrepancy may be due in part to model forcing errors arising from observational uncertainty in ozone changes [30] or to response errors; [31] suggest that models do not accurately capture convective changes in response to warming. Additionally, we find evidence (section S9) that models systematically under-estimate interannual and decadal variability in the dynamic indicator; this means that the model-obtained noise  $\epsilon$  may be too small and the resulting S/N ratio spuriously inflated. We note, however, that in computing the covariance matrix from which  $F_m(D, T)$  is calculated, we normalize  $D'_O(t)$  to unit variance, thereby removing the

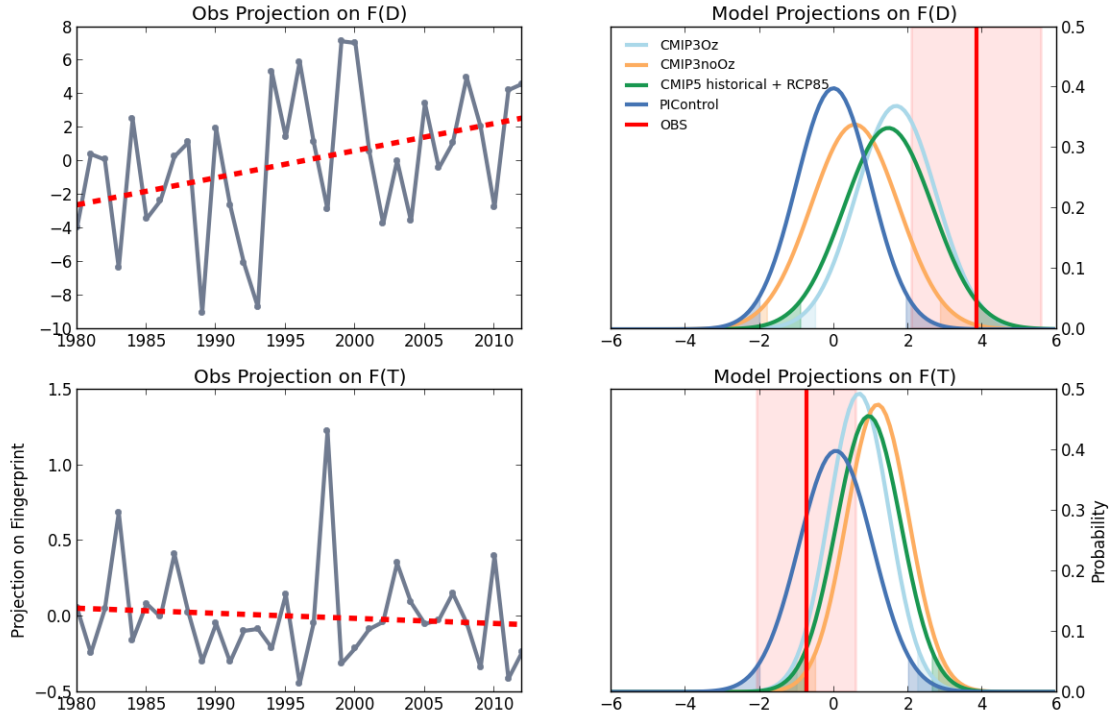

Figure S3: Projection time series and best-fit normal probability distribution functions (PDFs) for trends in the projection of model data onto the fingerprints  $F(D)$  (a-b) and  $F(T)$  (c-d). In the PDFs, all trends have been normalized by the relevant  $\epsilon$ , the standard error of the control distribution to obtain signal-to-noise ratios. The blue line shows the PDF of non-overlapping 33-year trends from the concatenated model pre-industrial control runs. The green line shows the PDF for individual CMIP5 historical/RCP8.5 model projection trends. Yellow/cyan lines show the PDF for CMIP3 models excluding/including stratospheric ozone depletion. For all PDFs, the two-sided 95% confidence intervals are shaded. The red line indicates the observed S/N ratio, and the shaded red box  $\pm$  one standard error in estimating the trend from assumed independent annual samples.

amplitude of variability. Our fingerprint therefore measures the *relationship* between the thermodynamic and dynamic indicators, not their respective amplitudes.

## S6.2 Observed thermodynamic trends

Figure S3c shows the projection of the observed thermodynamic indicator  $T'_O(t)$  onto the fingerprint  $F(T)$ . No clear trend is apparent in the time series. Figure S3d shows the S/N ratios for the different classes of model. The ALL3, ALL5, and NoOz3 cases do not differ significantly from each other (Table S1), although they do differ from the control distribution. This is consistent with expected thermodynamic effects: increasing GHG concentrations lead to higher temperatures and an intensification of the hydrological cycle, while ozone depletion alone does not affect precipitation intensity. The observed S/N ratio of -0.8 is compatible with internal variability: we do not detect a thermodynamic change alone.

### S6.2.1 Comparison with previous studies

This is not surprising: any mode of natural variability that moistens the tropics or dries the subtropics, ENSO included, will project onto  $F(T)$ , thereby reducing the signal-to-noise ratio. However, previous studies, e.g. [32, 33], have found that models underestimate the observed strengthening of the hydrological cycle. One possible explanation for the differences between this finding and previous literature is the dataset used. We use observational data from the GPCP dataset, which spans only the satellite era 1979-2012. This time period is shorter than that used in [33, 34] and includes the so-called global warming “hiatus”: the past fifteen years, over which the global temperature rise is significantly slower [35, 36] than that predicted by models [37].

The importance of both dataset and timescale can be seen in Figure S4, which repeats the analysis of [33] using GPCP 1979-2012 data. As in the original paper, annual anomaly data is used (in contrast with our work, which relies on DJF averages), and trends are calculated by zonally averaging and averaging over  $10^\circ$  -wide latitude bands. Anomalies are calculated with respect to the entire 1979-2012 period. The ocean mask used by the CCSM4 CMIP5 land model is re-gridded to the coarser GPCP grid and used to extract observational data over land only. We find that only the northern hemisphere drying trend differs significantly from zero.

Wentz et al [8] use the SSM/I dataset over ocean supplemented with GPCP data to show that the increase in observed precipitation is larger than that predicted by models and scales at roughly the same rate as tropospheric water vapor. Figure 2A in [8] shows an increasing trend in global average precipitation. However, this trend appears to disappear once updated GPCP data is incorporated, as shown in Figure S5, perhaps due to the muted warming trend in recent years.

We also note the low spatial resolution of our thermodynamic indicator:  $T'_O(t)$  measures variations at only five spatial points and moistening or drying over large regions is not necessarily captured by changes at a single latitude. Additionally, our study is designed to detect changes in the zonal mean and therefore ignores local changes that may be large in



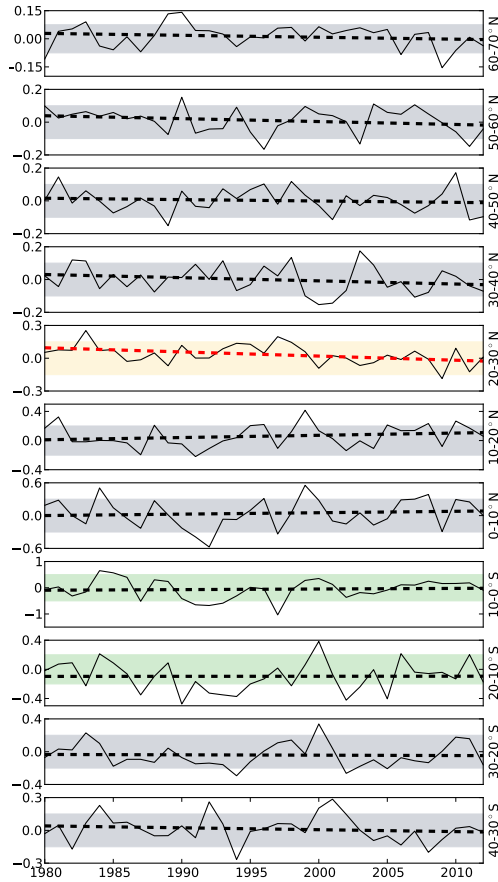

Figure S4: Repeating the analysis of [33] using GPCP data with oceans masked. Time series (black solid lines) are calculated by averaging land-only GPCP data over  $10^\circ$  latitude bands and all longitudes. Green (yellow) shading indicates bands where the trend is positive (negative) and agrees with the trend found by [33]. Gray shading indicates bands where the GPCP trend disagrees with [33]. Dashed lines indicate best-fit trends: red if the trend is significantly different from zero at 95% confidence; black otherwise.

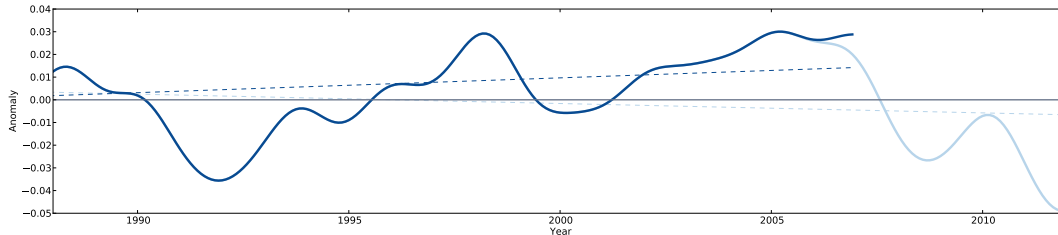

Figure S5: Anomaly time series of global average precipitation for 1988-2006 (dark blue) and 1988-2012 (light blue). As in [8], the seasonal cycle has been removed and data has been smoothed by convolution with a Gaussian distribution of width  $\pm 4$  months. The “minimum-norm” constraint [38] has been used at the boundaries, however, trends are not highly sensitive to the boundary conditions chosen. Trends are shown as dashed lines.

magnitude, particularly in the tropics [9]. As shown in Figure S6, the spatial structure of observed DJF precipitation trends in the tropics shows a large east-west gradient. These features, perhaps associated with an observed strengthening of the tropical Walker circulation [39], are averaged over in our methodology.

**Natural vs. Anthropogenic Forcing** Figure S7 is identical to Figures S3b and d, apart from two changes: trends are now calculated over the 26-period only, and results from model simulations incorporating historical natural forcing only are included. The results for projection onto  $F_m(D, T)$  are shown in the main text (Fig 3c). The trend distributions in the historicalNat model runs are nearly identical to those obtained from the pre-industrial control runs, indicating that natural forcing terms (solar variability and volcanic eruptions) do not change the overall distribution.

## S7 Relative Frequency Histograms

Figure S8 shows the relative frequency histograms of 33-year trends in CMIP5 control and spliced historical/RCP8.5 runs and in CMIP3 models including and excluding anthropogenic stratospheric ozone depletion. Best-fit normal distributions are shown in Figures S3b, S3d and 3b.

In order to determine whether the observed trends could have been drawn from the same distribution, we performed Kolmogorov-Smirnov tests on all pairs of distributions. The results are summarized in Table S7.

These tests show that:

**CMIP3 and CMIP5 are similar.** In all cases, the ALL5 trend distributions are statistically indistinguishable (N) from ALL3 trend distributions, indicating that CMIP5 and CMIP3 models that incorporate stratospheric ozone depletion perform similarly.

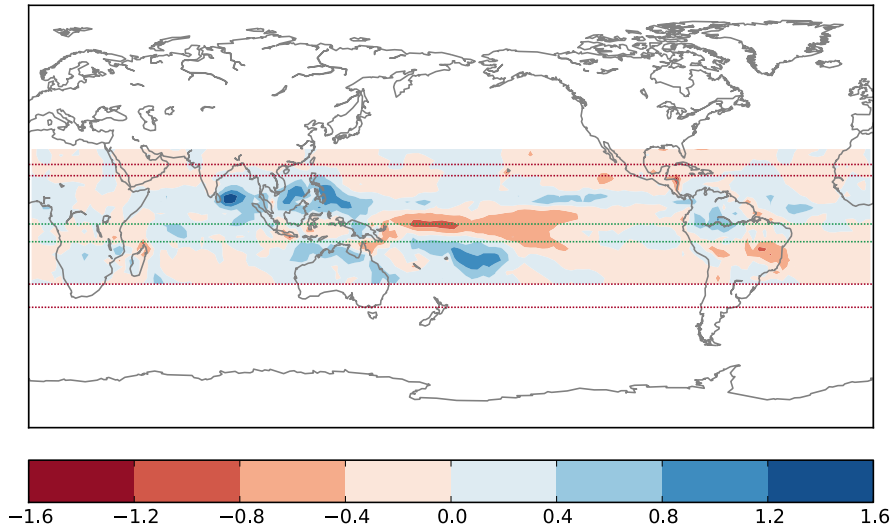

Figure S6: Trends in GPCP DJF average precipitation. Green lines show the range of latitudes identified as tropical peaks at each time step in the zonal average, while red lines show the range of latitudes identified as dry zone troughs in the zonal average. There is a clear east-west pattern in the trends, with drying in the central equatorial Pacific and moistening in the west, consistent with the persistent La Nina-like trend reported by e.g. [40].

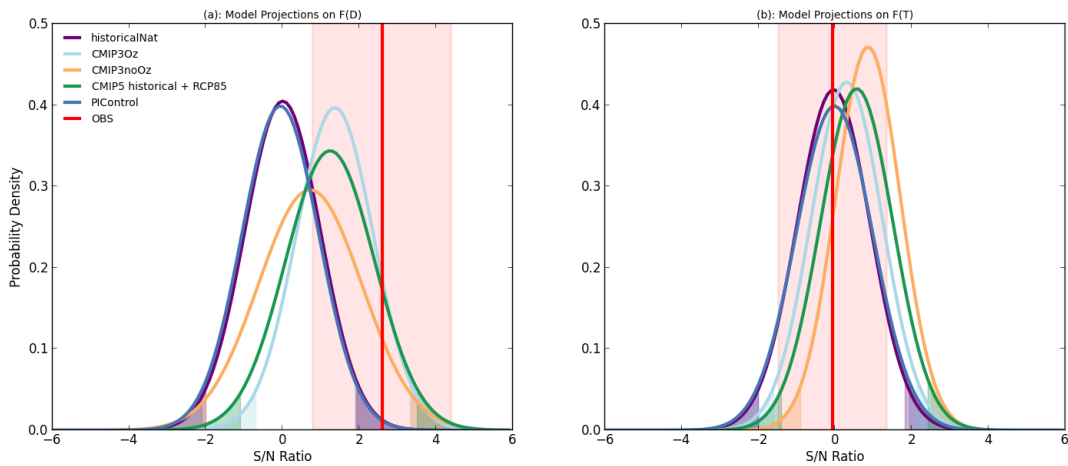

Figure S7: Same as Figure S2b and c, but using 26-year trends and including historicalNat experiments (purple)

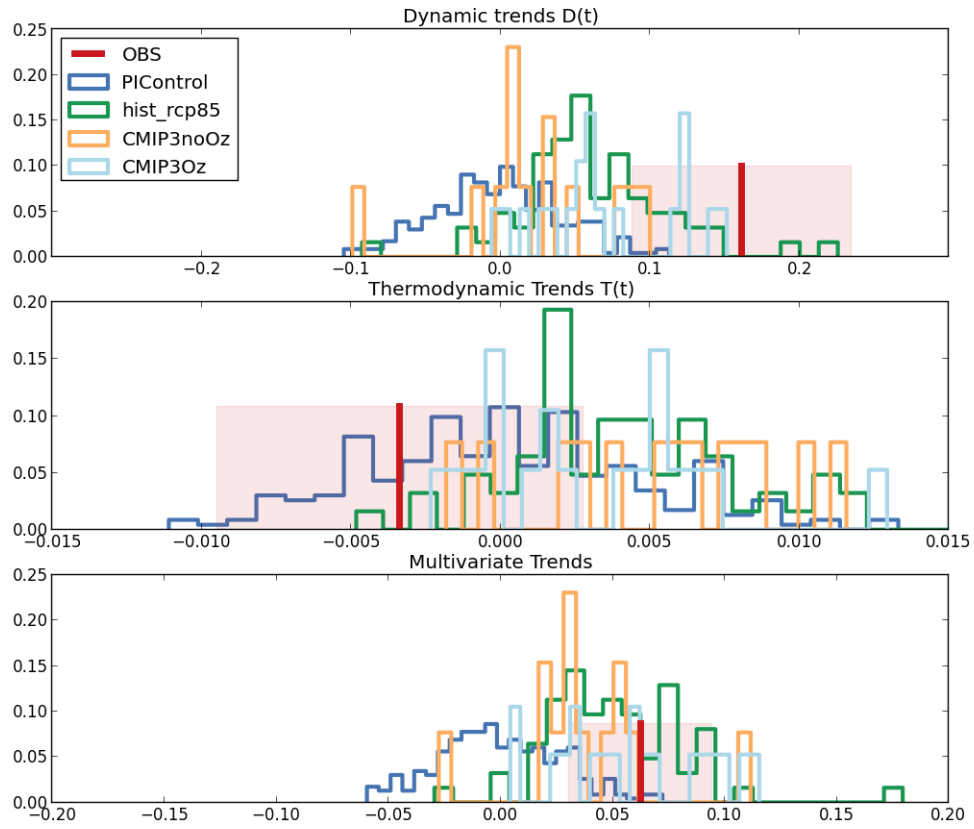

Figure S8: Relative-frequency histograms of 33-year trends in the projection of  $D'(t)$  onto  $F(D)$ (top),  $T'(t)$  on to  $F(T)$  (middle), and  $D'(t)$  and  $T'(t)$ , scaled to unit variance, onto  $F_m(D, T)$  (bottom)

|         | Control        | ALL5           | ALL3           | NoOz3       |
|---------|----------------|----------------|----------------|-------------|
| Control | —              | R***/R***/R*** | R***/R***/R*** | N/R***/R*** |
| ALL5    | R***/R***/R*** | —              | N/N/N          | R**/N/N     |
| ALL3    | R***/R***/R*** | N/N/N          | —              | R**/N/N     |
| NoOz3   | N/R***/R***    | R**/N/N        | R**/N/N        | —           |

Table S1: Results of Kolmogorov-Smirnov tests on the CMIP5 control and historical/RCP8.5 trend distributions and CMIP3 models including and excluding anthropogenic stratospheric ozone depletion. Results are reported for distributions of 33-year trends in projections onto  $F(D)/F(T)/F_m(D, T)$ . An N indicates that we do not reject the hypothesis that the trends are drawn from the same distribution, while R means we reject the null hypothesis with 90% (\*), 95% (\*\*), or 99% (\*\*\*) confidence.

**Ozone is important for dynamical shifts.** Anthropogenic stratospheric ozone depletion is required to produce positive trends in the projection on  $F(D)$ . Both the ALL5 and ALL3 trend distributions differ significantly from Control (at the 95% confidence level; R\*\*\*), while the NoOz3 distribution is statistically indistinguishable from Control (N). The trend distributions also differ between models including (ALL3, ALL5) and excluding (NoOz3) ozone depletion.

**External forcings other than ozone depletion are important for thermodynamic changes.**

For the projection onto  $F(T)$ , all three forced distributions (ALL5, ALL3, and NoOz3) differ significantly from the control distribution (R\*\*\*). This suggests, consistent with theory [41, 42], that models that do not include ozone depletion can still produce a thermodynamic response in the hydrological cycle.

**The covariance between T and D increases in forced models.** All three forced distributions differ significantly from the control distribution of trends in the projection onto the multivariate fingerprint  $F_m(D, T)$ .

## S8 Role of ENSO

In the main text, we contend (Figures 2a and 2c) that ENSO does not project well onto our multivariate fingerprint, and that projection onto  $F_m(D, T)$  acts as a passive noise filter. In this section we provide support for that claim. We investigate the role of ENSO, the primary mode of natural variability, by regressing the observed  $D'_O(t)$  and  $T'_O(t)$  on the observed sea-surface temperature 1979-2012 anomalies in the NINO3.4 region (120° W-170°W and 5°S-5°N) and re-calculating the projection trend with the regression removed to create ENSO-removed indicators  $D'_{O,ENSO}(t)$  and  $T'_{O,ENSO}(t)$ . For the multivariate projection, trends are re-calculated using the ENSO-removed location and intensity time series normalized to unit variance. This provides a fast and simple means of assessing the response of both

thermodynamic and dynamic indicators to ENSO variability. Figure S9 show the effect of removing ENSO in this way.

Removing ENSO from  $D'_O(t)$  and  $T'_O(t)$  individually changes the projection of these indicators onto their respective fingerprints. The trend in the projection of  $D'_{O,ENSO}(t)$  onto  $F(D)$  is slightly reduced relative to the trend in the raw projection. This indicates that removing ENSO flattens the trend slightly. The projection of  $T'_{O,ENSO}(t)$  onto  $F(T)$  reduces the size of the 1998 peak, and yields a non-significant positive trend. Both single-variable projection time series are noticeably altered when ENSO effects are regressed out.

When the ENSO-removed indicators are normalized and projected onto the multivariate fingerprint  $F_m(D, T)$ , however, the result is almost completely unchanged. This provides evidence for our contention that  $F_m(D, T)$  acts as an effective noise filter, because the primary noise mode, shown in Figure 2c in the main text, does not project onto the multivariate fingerprint.

## S9 Variability

In this section, we compare modeled and observed variability in the projections on D&A studies rely on credible model estimates of internal variability [43, 44]. If models systematically underestimate the amplitude of natural climate noise, this may lead to spurious detection due to artificially low noise, which inflates the S/N ratio. To investigate this possibility, we compare variability in observations and spliced CMIP5 historical/RCP8.5 runs. We first detrend modeled and observed time series of projections onto position  $F(D)$  and intensity  $F(T)$  fingerprints and then apply a band-pass filter to extract variability on scales between 5 and 20 years, as in [44]. We also apply a high-pass filter to extract variability on scales less than three years. Figure S1 shows the performance of models at simulating medium and high-frequency variability in the projections.

We find:

- Climate models indeed systematically underestimate variability in the projection of the modeled dynamic indicator  $D'(t)$  onto the multimodel fingerprint  $F(D)$  (Figure S10). This appears to be the case for both short and longer time scales. The multi-model average (white box) lies well in the lower left-hand quadrant.
- For the projection of  $T'(t)$  onto the fingerprint  $F(T)$ , the multi-model average overestimates decadal (5-20 year) variability, and captures observed short-term variability very well (Figure S11). However, there is considerable spread in model performance, with several underestimating variability on both short and long time scales.

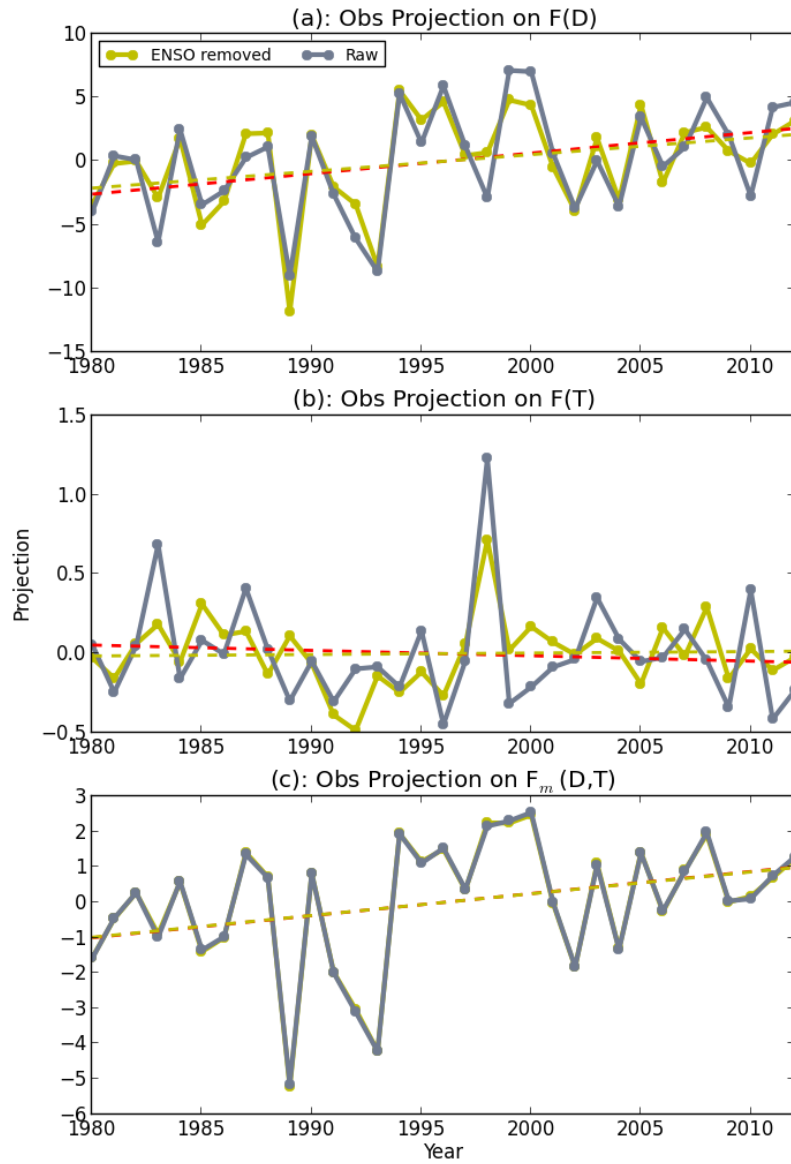

Figure S9: Projections onto the single-variable fingerprints a:  $F(D)$ , b:  $F(T)$ , and the multivariate fingerprint  $F_m(D,T)$  including time series in which the regression on NINO3.4 SSTs has been removed from the observations.

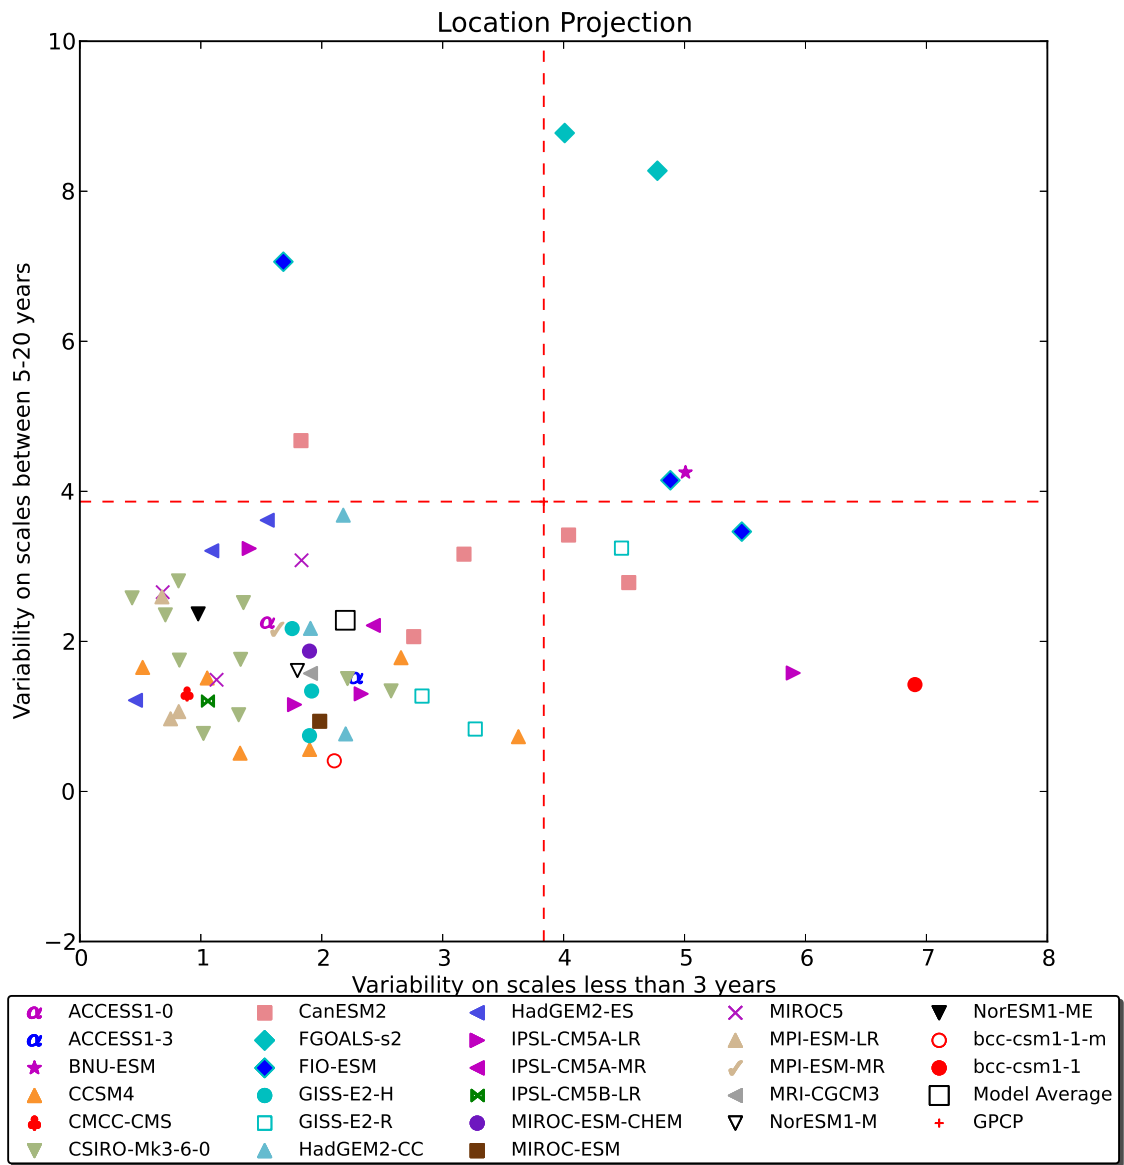

Figure S10: Comparison of modeled and observed variability in the projection of boreal winter mean peak location  $D'(t)$  on the fingerprint  $F(D)$ .



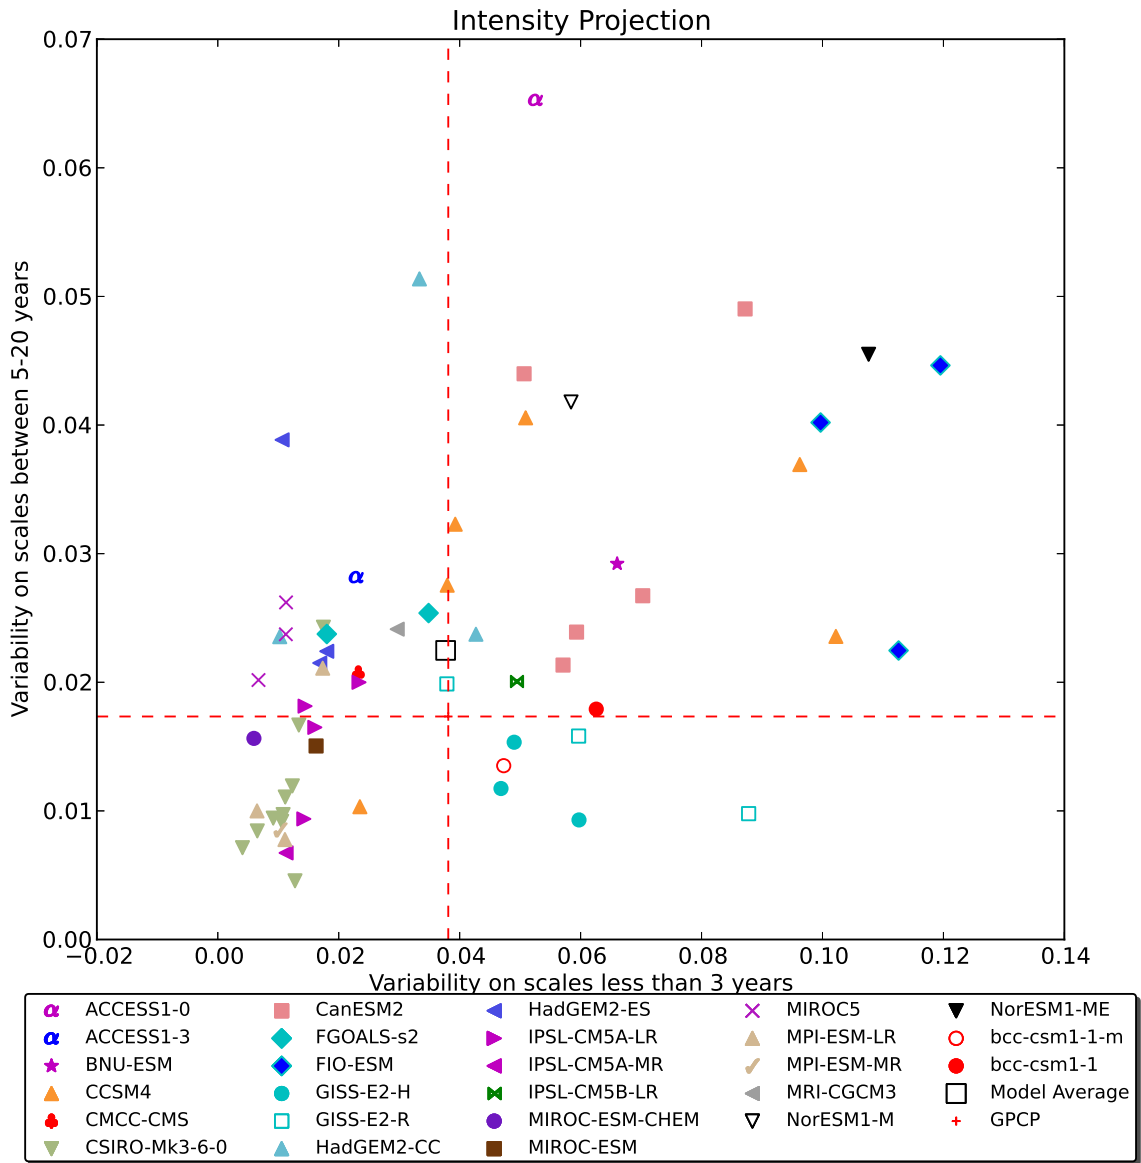

Figure S11: Comparison of modeled and observed variability in the projection of boreal winter mean peak intensity  $T'(t)$  on the fingerprint  $F(T)$ .

Table S2: Official acronyms and modeling center information of the CMIP5 models used in this study.

| <b>Model</b>     | <b>Country</b> | <b>Modeling Center</b>                                                                                                                                                                                                                        |
|------------------|----------------|-----------------------------------------------------------------------------------------------------------------------------------------------------------------------------------------------------------------------------------------------|
| ACCESS1-0        | Australia      | CSIRO (Commonwealth Scientific and Industrial Research Organisation), and BOM (Bureau of Meteorology), version 1.0                                                                                                                            |
| ACCESS1-3        | Australia      | CSIRO (Commonwealth Scientific and Industrial Research Organisation), and BOM (Bureau of Meteorology), version 1.3                                                                                                                            |
| bcc-csm1-1       | China          | Beijing Climate Center(BCC),China Meteorological Administration                                                                                                                                                                               |
| bcc-csm1-1-m     | China          | Beijing Climate Center(BCC),China Meteorological Administration                                                                                                                                                                               |
| BNU-ESM          | China          | College of Global Change and Earth System Science, Beijing Normal University                                                                                                                                                                  |
| CanESM2          | Canada         | Canadian Centre for Climate Modelling and Analysis                                                                                                                                                                                            |
| CCSM4            | USA            | NSF/DOE NCAR (National Center for Atmospheric Research) Boulder, CO                                                                                                                                                                           |
| CESM1-CAM5-1-FV2 | USA            | NSF/DOE NCAR (National Center for Atmospheric Research) Boulder, CO                                                                                                                                                                           |
| CESM1-WACCM      | USA            | NSF/DOE NCAR (National Center for Atmospheric Research) Boulder, CO, USA                                                                                                                                                                      |
| CMCC-CMS         | Italy          | CMCC - Centro Euro-Mediterraneo per i Cambiamenti Climatici, Bologna                                                                                                                                                                          |
| CNRM-CM5         | France         | CNRM (Centre National de Recherches Meteorologiques, Meteo-France, Toulouse,France) and CERFACS (Centre Europeen de Recherches et de Formation Avancee en Calcul Scientifique, Toulouse, France)                                              |
| CSIRO-Mk3-6-0    | Australia      | Australian Commonwealth Scientific and Industrial Research Organization (CSIRO) Marine and Atmospheric Research (Melbourne, Australia) in collaboration with the Queensland Climate Change Centre of Excellence (QCCCE) (Brisbane, Australia) |
| EC-EARTH         | EU             | EC-Earth (European Earth System Model)                                                                                                                                                                                                        |
| FGOALS-g2        | China          | IAP (Institute of Atmospheric Physics, Chinese Academy of Sciences, Beijing, China) and THU (Tsinghua University)                                                                                                                             |

Continued on next page

**Table S2 – continued from previous page**

| <b>Model</b>   | <b>Country</b> | <b>Modeling Center</b>                                                                                                                                                                                                            |
|----------------|----------------|-----------------------------------------------------------------------------------------------------------------------------------------------------------------------------------------------------------------------------------|
| FGOALS-s2      | China          | IAP(Institute of Atmospheric Physics),CAS(Chinese Academy of Sciences),Beijing,China                                                                                                                                              |
| FIO-ESM        | China          | FIO(The First Institution of Oceanography,SOA,Qingdao,China)                                                                                                                                                                      |
| GFDL-CM3       | USA            | NOAA GFDL(201 Forrestal Rd, Princeton, NJ, 08540)                                                                                                                                                                                 |
| GFDL-ESM2M     | USA            | NOAA GFDL(201 Forrestal Rd, Princeton, NJ, 08540)                                                                                                                                                                                 |
| GISS-E2-H      | USA            | NASA/GISS (Goddard Institute for Space Studies) New York, NY                                                                                                                                                                      |
| GISS-E2-R      | USA            | NASA/GISS (Goddard Institute for Space Studies) New York, NY                                                                                                                                                                      |
| HadGEM2-CC     | UK             | Met Office Hadley Centre, Fitzroy Road, Exeter, Devon, EX1 3PB, Carbon Cycle configuration ( <a href="http://www.metoffice.gov.uk">http://www.metoffice.gov.uk</a> )                                                              |
| HadGEM2-ES     | UK             | Met Office Hadley Centre, Fitzroy Road, Exeter, Devon, EX1 3PB, Earth System Configuration, ( <a href="http://www.metoffice.gov.uk">http://www.metoffice.gov.uk</a> )                                                             |
| IPSL-CM5A-LR   | France         | IPSL (Institut Pierre Simon Laplace, Paris), version 5a, low-resolution configuration                                                                                                                                             |
| IPSL-CM5A-MR   | France         | IPSL (Institut Pierre Simon Laplace, Paris, version 5a, medium-resolution configuration)                                                                                                                                          |
| IPSL-CM5B-LR   | France         | IPSL (Institut Pierre Simon Laplace, Paris, version 5b, low-resolution configuration)                                                                                                                                             |
| MIROC-ESM      | Japan          | JAMSTEC (Japan Agency for Marine-Earth Science and Technology, Kanagawa, Japan), AORI (Atmosphere and Ocean Research Institute, The University of Tokyo, Chiba), and NIES (National Institute for Environmental Studies, Ibaraki) |
| MIROC-ESM-CHEM | Japan          | JAMSTEC (Japan Agency for Marine-Earth Science and Technology, Kanagawa, Japan), AORI (Atmosphere and Ocean Research Institute, The University of Tokyo, Chiba), and NIES (National Institute for Environmental Studies, Ibaraki) |

Continued on next page

**Table S2 – continued from previous page**

| <b>Model</b> | <b>Country</b> | <b>Modeling Center</b>                                                                                                                                                                                                               |
|--------------|----------------|--------------------------------------------------------------------------------------------------------------------------------------------------------------------------------------------------------------------------------------|
| MIROC5       | Japan          | AORI (Atmosphere and Ocean Research Institute, The University of Tokyo, Chiba, Japan), NIES (National Institute for Environmental Studies, Ibaraki, Japan), JAMSTEC (Japan Agency for Marine-Earth Science and Technology, Kanagawa) |
| MPI-ESM-LR   | Germany        | Max Planck Institute for Meteorology, low-resolution configuration                                                                                                                                                                   |
| MPI-ESM-MR   | Germany        | Max Planck Institute for Meteorology, medium-resolution configuration                                                                                                                                                                |
| MRI-CGCM3    | Japan          | MRI (Meteorological Research Institute, Tsukuba)                                                                                                                                                                                     |
| NorESM1-M    | Norway         | Norwegian Climate Centre                                                                                                                                                                                                             |
| NorESM1-ME   | Norway         | Norwegian Climate Centre                                                                                                                                                                                                             |

Continued on next page

Table S3: Official acronyms and modeling center information of the CMIP3 models used in this study.

| <b>Model</b>      | <b>Country</b> | <b>Modeling Center</b>                                                                                                                                                                                                                       |
|-------------------|----------------|----------------------------------------------------------------------------------------------------------------------------------------------------------------------------------------------------------------------------------------------|
| BCCR-BCM2-0       | Norway         | BCCR (Bjerknes Centre for Climate Research) University of Bergen, Norway (www.bjerknes.uib.no) NERSC (Nansen Environmental and Remote Sensing Center, Norway (www.nersc.no) GFI (Geophysical Institute) University of Bergen),www.gfi.uib.no |
| CCCMA-CGCM3-1     | Canada         | CCCma (Canadian Centre for Climate Modelling and Analysis, Victoria, BC)                                                                                                                                                                     |
| CCCMA-CGCM3-1-T63 | Canada         | CCCma (Canadian Centre for Climate Modelling and Analysis, Victoria, BC)                                                                                                                                                                     |
| CNRM-CM3          | France         | CNRM (Centre National de Recherches Meteorologiques, Meteo-France, Toulouse)                                                                                                                                                                 |
| CSIRO-MK3-5       | Australia      | CSIRO (CSIRO Atmospheric Research, Melbourne)                                                                                                                                                                                                |
| GFDL-CM2-0        | USA            | NOAA GFDL (US Dept of Commerce / NOAA / Geophysical Fluid Dynamics Laboratory, Princeton, NJ)                                                                                                                                                |
| GFDL-CM2-1        | USA            | NOAA GFDL (US Dept of Commerce / NOAA / Geophysical Fluid Dynamics Laboratory, Princeton, NJ)                                                                                                                                                |
| GISS-AOM          | USA            | GISS (NASA/Goddard Institute for Space Studies, New York)                                                                                                                                                                                    |
| IAP-FGOALS1-0-G   | P.R. China     | IAP(LASG, Institute of Atmospheric Physics, P.O. Box 9804, Beijing 100029)                                                                                                                                                                   |
| INGV-ECHAM4       | Italy          | INGV (National Institute of Geophysics and Volcanology, Bologna)                                                                                                                                                                             |
| INMCM3-0          | Russia         | INM (Iistitute for Numerical Mathematics, Moscow)                                                                                                                                                                                            |
| MIROC3-2-HIRES    | Japan          | CCSR/NIES/FRCGC (Center for Climate System Research, Tokyo / National Institute for Environmental Studies, Ibaraki / Frontier Research Center for Global Change, Kanagawa)                                                                   |
| MIROC3-2-MEDRES   | Japan          | CCSR/NIES/FRCGC (Center for Climate System Research, Tokyo / National Institute for Environmental Studies, Ibaraki / Frontier Research Center for Global Change, Kanagawa)                                                                   |

Continued on next page

**Table S3 – continued from previous page**

| <b>Model</b> | <b>Country</b> | <b>Modeling Center</b>                                       |
|--------------|----------------|--------------------------------------------------------------|
| MPI-ECHAM5   | Germany        | MPI (Max Planck Institute for Meteorology, Hamburg)          |
| NCAR-CCSM3-0 | USA            | NCAR (National Center for Atmospheric Research, Boulder, CO) |

Continued on next page

Table S4: CMIP5 historical and RCP8.5 simulations used in this study, with their tracking IDs.

| Model         | EM      | Tracking ID (historical)             | Tracking ID (RCP8.5)                 |
|---------------|---------|--------------------------------------|--------------------------------------|
| ACCESS1-0     | r1i1p1  | df41be79-07e9-4303-811f-c9d2de55253  | b80b8832-db69-4417-80b2-5905062c0b0e |
| ACCESS1-3     | r1i1p1  | 26bfc8da-78ff-4b10-9e13-24492c09bb59 | 1dda3336-4462-46b0-b8bf-fb0788182796 |
| bcc-csm1-1-m  | r1i1p1  | 9091af95-2ea2-44e7-8d95-b3df204bee3b | c786d745-0811-46cd-9631-f98e11483c72 |
| bcc-csm1-1    | r1i1p1  | f78ba073-37d9-4337-89e6-0be697f466bd | c486cbf2-7aa5-490d-8ea0-52245dcd910  |
| BNU-ESM       | r1i1p1  | 7556ea82-127c-4e53-a9af-24a354151e96 | 6f2e40e4-3ef0-43fd-ad8e-5ed526e5557d |
| CanESM2       | r1i1p1  | e1808d37-64ec-4ed2-80a1-cdc14a78ae8a | 653bf3cc-fbd9-435e-a291-3b7b51636907 |
| CanESM2       | r2i1p1  | 492544c2-fbc9-4fcd-b387-c473a2c2b823 | 0eb1c34c-7755-4c74-aa42-f84e3aecab6f |
| CanESM2       | r3i1p1  | 74a7cb0f-9043-4b61-93c6-064f5f1f0275 | 50e24ecd-02f6-4502-a5c1-04d0bcef4abc |
| CanESM2       | r4i1p1  | ffed3ac5-bf02-4251-8fa2-397352697e03 | fc74a1c9-0c00-447d-ad3e-d7059334af10 |
| CanESM2       | r5i1p1  | 80a739c8-1ef0-4468-8c7e-9156e2f24492 | faaa5419-e76a-4f37-bfb8-e26c51e471eb |
| CCSM4         | r1i1p1  | eac78506-c7e5-40e6-92c5-fbc66f8ee568 | fed72455-6f74-4a13-a916-19be949b07c4 |
| CCSM4         | r2i1p1  | 3d32be36-cdfb-4a48-8d5c-d06704972642 | 177681c4-09a5-4419-a7d3-6e144c223be6 |
| CCSM4         | r3i1p1  | e9e731ac-8145-451e-b2a1-bba6f4d19812 | 65cc27fd-aeb7-415e-8723-10960233a8c8 |
| CCSM4         | r4i1p1  | f4038ee5-f79d-494d-bc71-900d0a6a8163 | bfffb3e-71bd-4299-84dd-1a3bd9bae89c  |
| CCSM4         | r5i1p1  | c218010d-b693-49e5-9378-8226302fc063 | 055cb5a3-e86a-4407-b0d1-39730141afc5 |
| CCSM4         | r6i1p1  | 31eebdcc-18f0-4219-b1ff-cd14c7232edd | 9edd796b-dd10-4c9a-a4fd-6c4746a40e58 |
| CMCC-CMS      | r1i1p1  | ca26f36f-e811-4085-877a-7ac0f6a1c452 | e17d4913-273b-4c4a-8aef-1530ee3b3284 |
| CSIRO-Mk3-6-0 | r10i1p1 | 7a72e5bd-36ea-40cb-856d-2021ceeb8082 | 7909bae4-a37f-4cf0-8627-f19349c12b43 |
| CSIRO-Mk3-6-0 | r1i1p1  | 51520639-1698-4708-a08f-4b6acf58394d | a693c52d-2fc3-437d-a9dd-8b0d41e8460e |
| CSIRO-Mk3-6-0 | r2i1p1  | c4cd67ba-7bf5-42c1-aa63-546198310017 | ff734e88-62f6-4a28-9d02-41d7ca4d6bcc |
| CSIRO-Mk3-6-0 | r3i1p1  | 2a9f4082-d382-43af-97ba-d73be4a69afb | 23bfb6df-c788-42a7-be09-09b4e6e705b1 |
| CSIRO-Mk3-6-0 | r4i1p1  | 8e41d4fd-af04-4c50-bb6a-4443d581c5cc | de97e306-42f9-4889-9f78-b3858ce090ea |
| CSIRO-Mk3-6-0 | r5i1p1  | 16366ab8-b765-4e16-a26b-72abb8506948 | fde6860d-e179-4271-a2fa-ac692bb9a973 |
| CSIRO-Mk3-6-0 | r6i1p1  | cffab938-c279-4c8a-b850-228e0e1c743d | d1140a1e-ffce-4146-8558-70074089a72b |
| CSIRO-Mk3-6-0 | r7i1p1  | c2dbec18-a621-4609-8c45-01f6c2a0c3b2 | fe2d8047-0f10-4d73-979c-6faea89e00ea |
| CSIRO-Mk3-6-0 | r8i1p1  | d6fa8d41-b119-43c1-bda0-6e061780b37e | 93b88165-ee6d-45f4-8bb4-544255ccb5ca |
| CSIRO-Mk3-6-0 | r9i1p1  | b20acc5a-1ddb-449d-af4f-f70b75c8fe1d | b2e511c6-34b0-482c-bc52-716a3b352799 |

Continued on next page

Table S4 – continued from previous page

| Model          | EM     | Tracking ID (historical)             | Tracking ID (RCP8.5)                   |
|----------------|--------|--------------------------------------|----------------------------------------|
| FGOALS-s2      | r2i1p1 | 1f4d2d39-38e1-422d-a053-4adea43a4658 | eaf20e1e-b0b8-42bc-97c9-c1d1bbbbb633a1 |
| FGOALS-s2      | r3i1p1 | 79822584-8c52-4fba-93a0-22c56536f9fa | 7a535af6-d516-4738-a2e0-1df064556a60   |
| FIO-ESM        | r1i1p1 | 0166a94a-f2ab-4dd3-bb1e-6b511139909b | 406a450e-784c-44ae-9dfd-5141d1b6aa7a   |
| FIO-ESM        | r2i1p1 | 206f07b0-d4cd-4d62-9a8b-974634cf6189 | bc2f85dc-2146-47cf-aff7-208a266b964c   |
| FIO-ESM        | r3i1p1 | 47eea2ab-0cc7-4ea1-a41c-5c82816a7bd2 | f04cc256-12c5-4255-a8d7-45b8a94c58b8   |
| GISS-E2-H      | r1i1p1 | 4a526154-8c40-4042-a4f2-95ade51683e9 | 28538783-f3cd-423d-bbe3-81bc56623c27   |
| GISS-E2-H      | r1i1p2 | d1ec6758-d394-4e93-88a5-d6cb4487c208 | df22a560-bd2d-4601-8a20-7dfd16836aad   |
| GISS-E2-H      | r1i1p3 | cc694480-0b05-4afe-99ff-ed0120d48572 | 9ca9a1ce-824c-4b55-a2ee-8cf5f45e1568   |
| GISS-E2-R      | r1i1p1 | 76e3b3ec-5319-41ae-96fe-7b65c92e9156 | 79c8b20e-2088-428e-ba9b-b1f248c6da2c   |
| GISS-E2-R      | r1i1p2 | df33b26e-80c8-4f49-b509-871ca7e23ce5 | 0ccc06ba-079f-46b0-9e2b-5cbbb3236c8d   |
| GISS-E2-R      | r1i1p3 | 6f8782a0-0cdd-400a-b446-5ab07f6a74b1 | 1e79cd98-76ba-4820-acbc-a073ae9a9f05   |
| HadGEM2-CC     | r1i1p1 | e5d8afb7-a477-4c3e-a9e1-39a25b7a78ad | 5d639530-1b3c-4d7a-8bab-1ba07b7be5408  |
| HadGEM2-CC     | r2i1p1 | 96e9adb1-2f3d-4799-8d36-fb5bc2469e2e | 1a066ef0-c748-4dbf-98e7-f5adb735901c   |
| HadGEM2-CC     | r3i1p1 | 898afafa-ad0d-40cc-861e-90318eec1519 | 17e7cc27-d517-4e26-b70b-83fd1dfa8129   |
| HadGEM2-ES     | r1i1p1 | 913a40aa-68f4-49a1-9f31-3baa0dd21819 | 5705fcfa-d7ce-4511-b005-077580c478c6   |
| HadGEM2-ES     | r2i1p1 | 896c28d8-59a3-45e5-8011-d8cb71371295 | 772137d0-51ab-47bb-9aa3-8bf3fc54edb    |
| HadGEM2-ES     | r4i1p1 | 191da815-e604-4e10-b598-44e624db0462 | 06e9d4cf-ee57-4e86-884e-48a5462925c5   |
| IPSL-CM5A-LR   | r1i1p1 | ca1f7e92-cda0-44c2-a30b-882b082b2148 | eaafed1f-837a-4883-b186-3fe6af039be7   |
| IPSL-CM5A-LR   | r2i1p1 | 79e179a6-4af7-4376-8c73-7b62164e6031 | c338c3ee-738f-46bd-a03f-dff6a1ac05c0   |
| IPSL-CM5A-LR   | r3i1p1 | ce99797f-166d-46ea-89e5-2ab64f56dcc7 | 1357fa71-20ff-4ace-b2c6-41bd7ed3df3e   |
| IPSL-CM5A-LR   | r4i1p1 | 13f97ff7-dadb-403e-b684-28ab5292a1ba | 8515bbb2-3723-4a26-8443-591c72c8d127   |
| IPSL-CM5A-MR   | r1i1p1 | 2bbc974d-cb9b-47b0-889f-c0abdc6f201a | 24fb1076-d7dd-4253-861f-abb97300d5b    |
| IPSL-CM5B-LR   | r1i1p1 | 2c75cfae-1e9f-412d-96ae-3e173c426b2f | f4241283-dba0-45f1-868e-d6baa9d662f3   |
| MIROC-ESM-CHEM | r1i1p1 | 486889a5-cd6b-4f93-a6b6-87d541b28c7e | 2ff8ea60-0358-4c75-be82-0e569887b8a7   |
| MIROC-ESM      | r1i1p1 | 37cdd6d6-308a-4476-a2b0-448809467c01 | 84ad336d-7373-41d8-a6ec-c49cdd9867a0   |
| MIROC5         | r1i1p1 | a906be44-c850-4f0c-b8c4-2b165051669a | c09c0981-a9a3-4a13-a2db-4204f8108609   |
| MIROC5         | r2i1p1 | b50b70f1-a9c4-4f63-9f8b-d60339913674 | ec41e082-357e-46a1-83be-dcae91e14625   |
| MIROC5         | r3i1p1 | cacb48c2-15ab-420f-91da-c8bb673653bf | 6e8cf05d-6bf2-4666-b90f-b237c8aeaacb   |
| MPI-ESM-LR     | r1i1p1 | 00de7790-7297-4bc7-b494-10d2a9727b0d | 2c059f4d-4118-4c50-bac7-4d05c3a3af58   |

Continued on next page



Table S4 – continued from previous page

| Model      | EM     | Tracking ID (historical)             | Tracking ID (RCP8.5)                 |
|------------|--------|--------------------------------------|--------------------------------------|
| MPI-ESM-LR | r2i1p1 | b83cbaab-7062-47ac-b978-b02ac72bcba1 | f1765e87-ba94-41b4-8374-85255db69e85 |
| MPI-ESM-LR | r3i1p1 | 5ac7b497-51b3-4070-b004-352956fc42ed | cf89a31e-079b-4d7b-bfd6-d400b935cd08 |
| MPI-ESM-MR | r1i1p1 | f94bedfd-180d-43ad-b12d-99f102968059 | 87fa3a10-89ff-453e-b230-8c29b76bea9e |
| MRI-CGCM3  | r1i1p1 | 20b61f7b-f6e0-4c53-b6dc-8ddffb8ecef  | e0f6773e-5a70-4e97-9dc2-546ce922b80b |
| NorESM1-M  | r1i1p1 | 5ccde64e-cfe8-47f6-9de8-9ea1621e7781 | 22a230b1-5759-45e3-8a40-04b6908be7f0 |
| NorESM1-ME | r1i1p1 | 8b49fc24-7ff8-4315-bf54-96cedf69f5bf | 557a20d8-65b9-415b-a53c-1a037c804102 |

Table S5: CMIP5 pre-industrial control runs used.

| Model          | EM       | Tracking ID                            | Control run length (months) |
|----------------|----------|----------------------------------------|-----------------------------|
| ACCESS1-0      | rli1p1   | 45165b72-2dd2-4220-bc19-b8ced61957e1   | 3000                        |
| bcc-csm1-1-m   | rli1p1   | e00ffb13-a233-48ed-a927-1d334b1191d1   | 4800                        |
| bcc-csm1-1     | rli1p1   | e8227cab-28e1-46e5-b848-524a73c454b4   | 6000                        |
| BNU-ESM        | rli1p1   | 0f152d3c-294a-4d81-b910-112d6f3dc726   | 6708                        |
| CamESM2        | rli1p1   | 43f9343c-141e-4a0a-a86b-6022b60f0bee   | 11952                       |
| CCSM4          | rli1p1   | 537336b0-e0f4-4f1c-9ea5-c616db3e1e0f   | 6012                        |
| CCSM4          | r2i1p1   | 77a7f43c-1c47-4eb3-b5f6-1cf3228c621f   | 1872                        |
| CESM1-BGC      | rli1p1   | 713ec684-49d0-4719-b094-f9bda3aea14e   | 6000                        |
| CESM1-FASTCHEM | rli1p1   | cc64fc83-dal1b-4882-804e-572682c9b442  | 2664                        |
| CESM1-WACCM    | rli1p1   | f7787226-3c18-4a65-873a-6ca909fb5400   | 2400                        |
| CMCC-CESM      | rli1p1   | a66911d4-1a92-47fb-a180-a5ebe521fa34   | 3324                        |
| CMCC-CM        | rli1p1   | a14473e0-cba9-4f96-b8cc-65ad12700305   | 3960                        |
| CMCC-CMS       | rli1p1   | bd28353c-bb6d-4430-8da1-48c652db2bd5   | 6000                        |
| CNRM-CM5       | rli1p1   | 31913117-8774-439c-8421-d460db86a306   | 10200                       |
| CSIRO-Mk3-6-0  | rli1p1   | 679e456b-519a-42ec-b8d2-45107b358483   | 6000                        |
| FGOALS-s2      | rli1p1   | f11f0692-cbac-4221-a726-56a01f394d4d   | 6012                        |
| FIO-ESM        | rli1p1   | 1d0d14df-aa56-4ac0-a698-3c9349bc8b9c   | 9600                        |
| GFDL-CM3       | rli1p1   | c6909aeb-77b3-4dc7-a779-a803a3c3a410   | 6000                        |
| GFDL-ESM2G     | rli1p1   | 0b7417cf-27e8-4983-87ec-db2571ee17ee   | 6000                        |
| GFDL-ESM2M     | rli1p1   | 3a84b984-747a-4305-b54f-444c862cd564   | 6000                        |
| GISS-E2-H-CC   | rli1p1   | 1c646280-b2e7-4662-aef8-77167c7c8779   | 3012                        |
| GISS-E2-H      | rli1p1   | dd272108-4d6e-43b0-ae79-4b7e357b788d   | 9360                        |
| GISS-E2-H      | rli1p2   | 241dff6c-2-8f05-4dc9-bc3e-0c4b5fe07c5e | 6372                        |
| GISS-E2-H      | rli1p3   | 8e121eaa-6b13-473d-bdca-8a904617f67c   | 6372                        |
| GISS-E2-R      | rli1p1   | 4771ae9d-26e7-4ff5-ac17-c96dd7eccbf1   | 1200                        |
| GISS-E2-R      | rli1p141 | a058c2ee-5505-4d3d-ae98-73bd622d2c69   | 13956                       |
| GISS-E2-R      | rli1p142 | 4771ae9d-26e7-4ff5-ac17-c96dd7eccbf1   | 1200                        |
| GISS-E2-R      | rli1p2   | 5006be04-3af4-4737-a801-8858c2808cee   | 6372                        |

Continued on next page

Table S5 – continued from previous page

| Model          | EM     | Tracking ID                          | Control run length (months) |
|----------------|--------|--------------------------------------|-----------------------------|
| HadGEM2-CC     | rli1p1 | e939a08c-0124-4b8e-a860-4668b48c6ebe | 2881                        |
| HadGEM2-ES     | rli1p1 | df32d410-cbf3-400b-b18f-80133f89bf9f | 6912                        |
| inmcm4         | rli1p1 | d3a5f274-0098-48cd-9bb3-b7dfe70b436e | 6000                        |
| IPSL-CM5A-LR   | rli1p1 | c548ab3d-6da6-40fe-8988-af659b74309c | 12000                       |
| IPSL-CM5A-MR   | rli1p1 | beba2e96-6147-44eb-a552-7c884bc1ecb8 | 3600                        |
| MIROC-ESM-CHEM | rli1p1 | 6b05dfd5-52ce-4edd-bc2b-cae6bdb9c83b | 3060                        |
| MIROC5         | rli1p1 | 61a2f7d3-9c1c-44f1-ae97-04495b4485e7 | 8040                        |
| MPI-ESM-LR     | rli1p1 | e12c9ceb-362a-4aab-ab7c-b34cafd3290d | 12000                       |
| MPI-ESM-P      | rli1p1 | 5d3051e7-ffe3-4bc3-9548-5507c597a546 | 13872                       |
| MRI-CGCM3      | rli1p1 | 6c78deac-6f86-4d8a-a183-6b9fa473f062 | 6000                        |
| NorESM1-ME     | rli1p1 | c7b4237f-de60-4298-8fd0-1f882d5e42a0 | 3024                        |

Table S6: List of CMIP3 coupled climate model simulations used

| Model             | Number of realizations | Includes ozone depletion? |
|-------------------|------------------------|---------------------------|
| BCCR-BCM2-0       | 1                      | No                        |
| CCCMA-CGCM3-1     | 5                      | No                        |
| CCCMA-CGCM3-1-T63 | 1                      | No                        |
| CNRM-CM3          | 1                      | No                        |
| CSIRO-MK3-5       | 1                      | Yes                       |
| GFDL-CM2-0        | 1                      | Yes                       |
| GFDL-CM2-1        | 1                      | Yes                       |
| GISS-AOM          | 2                      | No                        |
| IAP-FGOALS1-0-G   | 3                      | No                        |
| INGV-ECHAM4       | 1                      | Yes                       |
| INMCM3-0          | 1                      | No                        |
| MIROC3-2-HIRES    | 1                      | Yes                       |
| MIROC3-2-MEDRES   | 3                      | Yes                       |
| MPI-ECHAM5        | 4                      | Yes                       |
| NCAR-CCSM3-0      | 7                      | Yes                       |

Table S7: CMIP5 historicalNat runs used.

| Model            | EM     | Tracking ID                          | HistoricalNat run length (months) |
|------------------|--------|--------------------------------------|-----------------------------------|
| bcc-csm1-1       | r1i1p1 | 33009978-4203-4c00-adbd-e80b23399094 | 1956                              |
| BNU-ESM          | r1i1p1 | 1a6b29b1-cf46-4da4-b751-e8d3f6dcee74 | 1872                              |
| CanESM2          | r1i1p1 | 5b2e4672-2c32-4db6-811e-e03e09337559 | 1956                              |
| CanESM2          | r2i1p1 | 2166192d-9be7-4fe3-a711-2ca45974b1e5 | 1956                              |
| CanESM2          | r3i1p1 | 6cf528d0-ccab-4f8b-8b94-5a0a28e9cb56 | 1956                              |
| CanESM2          | r4i1p1 | 90df8edf-2e38-4729-bc5e-69ccaedee9ad | 1956                              |
| CanESM2          | r5i1p1 | 1f32e147-f052-48bd-9ffe-76b7289fc4ee | 1956                              |
| CCSM4            | r1i1p1 | 47521ee8-d9cf-498c-a071-dd69e56797c0 | 1872                              |
| CCSM4            | r2i1p1 | b2854d9f-ac76-427f-8ce9-e0c8da98a3b4 | 1872                              |
| CCSM4            | r4i1p1 | 8ad7ce45-565c-4e6c-bc59-76c021e766a4 | 1872                              |
| CCSM4            | r6i1p1 | 899bad47-f539-40ac-8784-ef340b34fd18 | 1872                              |
| CESM1-CAM5-1-FV2 | r3i1p1 | caaa3ec0-7efc-417e-b8ad-759ae88342e5 | 1872                              |
| CESM1-CAM5-1-FV2 | r4i1p1 | 97118574-c6b9-4f91-bbd2-a5b12bdb74c3 | 1872                              |
| CNRM-CM5         | r1i1p1 | 5db133b4-be65-4653-89ba-0f00a7dee832 | 1956                              |
| CNRM-CM5         | r2i1p1 | 8a6b1e65-83d7-462d-9c78-fe9e18281502 | 1956                              |
| CNRM-CM5         | r3i1p1 | cadaeed1-195f-4f40-9281-769aae942    | 1956                              |
| CNRM-CM5         | r4i1p1 | 1a80c989-135f-409e-8b63-51554aaf6df1 | 1956                              |
| CNRM-CM5         | r5i1p1 | 46556fb6-aefb-4141-a717-2ca6f5f30e40 | 1956                              |
| CNRM-CM5         | r8i1p1 | 6ff1024c-f7f6-4dc6-a96e-4ac1f22c86a4 | 1956                              |
| CSIRO-Mk3-6-0    | r1i1p1 | fb18df28-e176-4a10-9fab-2db7d5bb7212 | 1956                              |
| CSIRO-Mk3-6-0    | r2i1p1 | 33692d3d-74c5-4cd3-bd46-906e38b14b4c | 1956                              |
| CSIRO-Mk3-6-0    | r3i1p1 | 49b2919c-2e7f-4384-a372-edb49adac8ed | 1956                              |
| CSIRO-Mk3-6-0    | r4i1p1 | 962dd1cb-44aa-4669-b905-f000a3675911 | 1956                              |
| CSIRO-Mk3-6-0    | r5i1p1 | b7a18f85-6dab-4565-a10b-0abf8594d588 | 1956                              |
| GFDL-CM3         | r1i1p1 | a378d727-04fa-4626-b7b6-1d4a1089a041 | 1752                              |
| GFDL-CM3         | r3i1p1 | 027f391d-d6cd-4887-997e-66f6ecd31fed | 1752                              |
| GFDL-CM3         | r5i1p1 | 0b3a9c71-3406-450a-bce6-1ac8290e3cdf | 1752                              |
| GFDL-ESM2M       | r1i1p1 | ed314c0c-01f0-48af-b9e4-d8a4ad534db8 | 1740                              |

Continued on next page

Table S7 – continued from previous page

| Model          | EM     | Tracking ID                           | HistoricalNat run length (months) |
|----------------|--------|---------------------------------------|-----------------------------------|
| GISS-E2-H      | r1i1p1 | e57ddf4-5263-484e-8ca5-4cad3798252d   | 1956                              |
| GISS-E2-H      | r2i1p1 | 9228646e-58cf-4631-b63b-84789b7ff09d  | 1956                              |
| GISS-E2-H      | r3i1p1 | 7dc3cd32-fece-4eb1-b1e9-4f4b6f9e2e89  | 1956                              |
| GISS-E2-H      | r4i1p1 | f793a225-0299-4ac3-b031-438e64212f39  | 1956                              |
| GISS-E2-H      | r5i1p1 | 35a7b1e9-1a5e-4294-9340-b3cb581040b3  | 1956                              |
| GISS-E2-R      | r1i1p1 | 8f4967cd-39c3-4079-b032-451e5092f5f8  | 1956                              |
| GISS-E2-R      | r1i1p3 | 444910a5-7959-4484-8367-0699ed0236b44 | 1956                              |
| GISS-E2-R      | r2i1p1 | de5f27c4-302e-4d2e-9b6a-02e2da2c9ba7  | 1956                              |
| GISS-E2-R      | r2i1p3 | 677786ee-48cd-407e-842e-0bcfd417093   | 1956                              |
| GISS-E2-R      | r3i1p1 | c33293ce-df08-4a67-bd7c-5fa3e4968532  | 1956                              |
| GISS-E2-R      | r3i1p3 | 6fb681b3-2ced-4e89-9739-db09e1bcf290  | 1956                              |
| GISS-E2-R      | r4i1p1 | 8c1d5dbd-a415-44f6-8dd3-3e7788c6c583  | 1956                              |
| GISS-E2-R      | r4i1p3 | bc0ffbf-c610-4db9-9636-7880a021189d   | 1956                              |
| GISS-E2-R      | r5i1p1 | 7db601a4-fd9a-46dc-a083-f7fc78a1747e  | 1956                              |
| GISS-E2-R      | r5i1p3 | cd3d1e19-3e7b-4c2f-8d4a-bf120feeffe   | 1956                              |
| HadGEM2-ES     | r1i1p1 | 4d31b005-5993-4de7-b230-ec6454d40055  | 1920                              |
| HadGEM2-ES     | r2i1p1 | ddec24d0-394d-4e7f-bdb4-d5fe855e73a8  | 1921                              |
| HadGEM2-ES     | r3i1p1 | cea7eaf1-f362-4558-9f08-ac38ab48c02c  | 1920                              |
| HadGEM2-ES     | r4i1p1 | deb91742-6d9b-41b8-a35a-5ac8e9169956  | 1921                              |
| IPSL-CM5A-LR   | r1i1p1 | fe3e40dc-8954-4370-a4ea-3ccc3f33a329  | 1956                              |
| IPSL-CM5A-LR   | r2i1p1 | 091c6929-8edf-4ef7-84dc-b425b6134013  | 1956                              |
| IPSL-CM5A-LR   | r3i1p1 | 2b6eeea8-a940-415e-8d69-ea64df040bad  | 1956                              |
| IPSL-CM5A-MR   | r1i1p1 | 8246ee3f-c1fe-4822-942f-5a408af34390  | 1956                              |
| IPSL-CM5A-MR   | r2i1p1 | 52b8b7b4-25fd-4995-8ee4-5583ab16ccb4  | 1956                              |
| IPSL-CM5A-MR   | r3i1p1 | 842615d4-3b84-45e3-81b4-9bb26460839f  | 1956                              |
| MIROC-ESM-CHEM | r1i1p1 | a7894ab5-e60e-48f2-bc0c-cca1e1532f7f  | 1872                              |
| MIROC-ESM      | r1i1p1 | 44ffc7bf-6c1a-4c57-b246-5f544a544972  | 1872                              |
| MIROC-ESM      | r2i1p1 | 0c1c2b27-fa64-4ef4-b22b-5adc1b55273d  | 1872                              |
| MIROC-ESM      | r3i1p1 | 8ca0cb25-8787-4e91-afdc-26bbe28d0297  | 1872                              |

Continued on next page

Table S7 – continued from previous page

| Model     | EM     | Tracking ID                          | HistoricalNat run length (months) |
|-----------|--------|--------------------------------------|-----------------------------------|
| MRI-CGCM3 | r1i1p1 | f495cc5a-4332-470a-8e4a-d2cc1b629cb6 | 1872                              |
| NorESM1-M | r1i1p1 | 7152b5a2-e51d-4a4d-8367-514f6932eadd | 1956                              |

## References

- [1] Meehl, G, Covey, C, Delworth, T, Latif, M, McAvaney, B, Mitchell, J, Stouffer, R, & Taylor, K. (2007) The wcrp cmip3 multi-model dataset: A new era in climate change research. *Bulletin of the American Meteorological Society* **88**, 1383–1394.
- [2] Taylor, K. E, Stouffer, R. J, & Meehl, G. A. (2012) An overview of cmip5 and the experiment design. *Bulletin of the American Meteorological Society* **93**, 485–498.
- [3] Van Vuuren, D. P, Edmonds, J, Kainuma, M, Riahi, K, Thomson, A, Hibbard, K, Hurtt, G. C, Kram, T, Krey, V, Lamarque, J.-F, et al. (2011) The representative concentration pathways: an overview. *Climatic Change* **109**, 5–31.
- [4] Nakicenovic, N, Alcamo, J, Davis, G, de Vries, B, Fenhann, J, Gaffin, S, Gregory, K, Grubler, A, Jung, T. Y, Kram, T, et al. (2000) Special report on emissions scenarios: a special report of working group iii of the intergovernmental panel on climate change, (Pacific Northwest National Laboratory, Richland, WA (US), Environmental Molecular Sciences Laboratory (US)), Technical report.
- [5] Min, S.-K & Son, S.-W. (2013) Multi-model attribution of the southern hemisphere hadley cell widening: Major role of ozone depletion. *Journal of Geophysical Research: Atmospheres*.
- [6] Adler, R. F, Huffman, G. J, Chang, A, Ferraro, R, Xie, P.-P, Janowiak, J, Rudolf, B, Schneider, U, Curtis, S, Bolvin, D, et al. (2003) The version-2 global precipitation climatology project (gpcp) monthly precipitation analysis (1979-present). *Journal of Hydrometeorology* **4**, 1147–1167.
- [7] Yin, X, Gruber, A, & Arkin, P. (2004) Comparison of the gpcp and cmap merged gauge-satellite monthly precipitation products for the period 1979-2001. *Journal of Hydrometeorology* **5**, 1207–1222.
- [8] Wentz, F. J, Ricciardulli, L, Hilburn, K, & Mears, C. (2007) How much more rain will global warming bring? *Science* **317**, 233–235.
- [9] Allan, R. P, Soden, B. J, John, V. O, Ingram, W, & Good, P. (2010) Current changes in tropical precipitation. *Environmental Research Letters* **5**, 025205.
- [10] Polvani, L. M, Waugh, D. W, Correa, G. J, & Son, S.-W. (2011) Stratospheric ozone depletion: The main driver of twentieth-century atmospheric circulation changes in the southern hemisphere. *Journal of Climate* **24**, 795–812.
- [11] Marvel, K, Ivanova, D, & Taylor, K. (2013) Scale space methods for climate model analysis. *Journal of Geophysical Research: Atmospheres*.
- [12] Allen, M & Stott, P. (2003) Estimating signal amplitudes in optimal fingerprinting, part i: Theory. *Climate Dynamics* **21**, 477–491.



- [13] Gillett, N, Zwiers, F, Weaver, A, Hegerl, G, Allen, M, & Stott, P. (2002) Detecting anthropogenic influence with a multi-model ensemble. *Geophysical Research Letters* **29**, 31–1.
- [14] Hegerl, G. C, von STORCH, H, Hasselmann, K, Santer, B. D, Cubasch, U, & Jones, P. D. (1996) Detecting greenhouse-gas-induced climate change with an optimal fingerprint method. *Journal of Climate* **9**, 2281–2306.
- [15] Stott, P. A, Tett, S, Jones, G, Allen, M, Mitchell, J, & Jenkins, G. (2000) External control of 20th century temperature by natural and anthropogenic forcings. *Science* **290**, 2133–2137.
- [16] Tett, S. F, Jones, G. S, Stott, P. A, Hill, D. C, Mitchell, J. F, Allen, M. R, Ingram, W. J, Johns, T. C, Johnson, C. E, Jones, A, et al. (2002) Estimation of natural and anthropogenic contributions to twentieth century temperature change. *Journal of Geophysical Research* **107**, 4306.
- [17] Santer, B. D, Painter, J. F, Mears, C. A, Doutriaux, C, Caldwell, P, Arblaster, J. M, Cameron-Smith, P. J, Gillett, N. P, Gleckler, P. J, Lanzante, J, et al. (2013) Identifying human influences on atmospheric temperature. *Proceedings of the National Academy of Sciences* **110**, 26–33.
- [18] Scheff, J & Frierson, D. M. (2012) Robust future precipitation declines in cmip5 largely reflect the poleward expansion of model subtropical dry zones. *Geophysical Research Letters* **39**.
- [19] Deser, C & Phillips, A. S. (2009) Atmospheric circulation trends, 1950-2000: The relative roles of sea surface temperature forcing and direct atmospheric radiative forcing. *Journal of Climate* **22**, 396–413.
- [20] Fyfe, J, Gillett, N, & Marshall, G. (2012) Human influence on extratropical southern hemisphere summer precipitation. *Geophysical Research Letters* **39**.
- [21] Johanson, C. M & Fu, Q. (2009) Hadley cell widening: Model simulations versus observations. *Journal of Climate* **22**, 2713–2725.
- [22] Seidel, D. J, Fu, Q, Randel, W. J, & Reichler, T. J. (2007) Widening of the tropical belt in a changing climate. *Nature Geoscience* **1**, 21–24.
- [23] Archer, C. L & Caldeira, K. (2008) Historical trends in the jet streams. *Geophysical Research Letters* **35**.
- [24] Fogt, R. L, Perlwitz, J, Monaghan, A. J, Bromwich, D. H, Jones, J. M, & Marshall, G. J. (2009) Historical sam variability. part ii: Twentieth-century variability and trends from reconstructions, observations, and the ipcc ar4 models\*. *Journal of Climate* **22**, 5346–5365.

- [25] Marshall, G. J. (2003) Trends in the southern annular mode from observations and reanalyses. *Journal of Climate* **16**, 4134–4143.
- [26] Thompson, D. W, Wallace, J. M, & Hegerl, G. C. (2000) Annular modes in the extratropical circulation. part ii: Trends. *Journal of Climate* **13**, 1018–1036.
- [27] Hu, Y, Fu, Q, et al. (2007) Observed poleward expansion of the hadley circulation since 1979. *Atmos. Chem. Phys* **7**, 5229–5236.
- [28] Previdi, M & Liepert, B. G. (2007) Annular modes and hadley cell expansion under global warming. *Geophysical Research Letters* **34**.
- [29] Davis, S. M & Rosenlof, K. H. (2012) A multidiagnostic intercomparison of tropical-width time series using reanalyses and satellite observations. *Journal of Climate* **25**, 1061–1078.
- [30] Solomon, S, Young, P. J, & Hassler, B. (2012) Uncertainties in the evolution of stratospheric ozone and implications for recent temperature changes in the tropical lower stratosphere. *Geophysical Research Letters* **39**.
- [31] Grassi, B, Redaelli, G, Canziani, P. O, & Visconti, G. (2012) Effects of the pdo phase on the tropical belt width. *Journal of Climate* **25**, 3282–3290.
- [32] Polson, D, Hegerl, G. C, Zhang, X, & Osborn, T. J. (2013) Causes of robust seasonal land precipitation changes. *Journal of Climate*.
- [33] Zhang, X, Zwiers, F. W, Hegerl, G. C, Lambert, F. H, Gillett, N. P, Solomon, S, Stott, P. A, & Nozawa, T. (2007) Detection of human influence on twentieth-century precipitation trends. *Nature* **448**, 461–465.
- [34] Noake, K, Polson, D, Hegerl, G, & Zhang, X. (2012) Changes in seasonal land precipitation during the latter twentieth-century. *Geophysical Research Letters* **39**.
- [35] Easterling, D. R & Wehner, M. F. (2009) Is the climate warming or cooling? *Geophysical Research Letters* **36**.
- [36] Foster, G & Rahmstorf, S. (2011) Global temperature evolution 1979–2010. *Environmental Research Letters* **6**, 044022.
- [37] Fyfe, J. C, Gillett, N. P, & Zwiers, F. W. (2013) Overestimated global warming over the past 20 years. *Nature Climate Change* **3**, 767–769.
- [38] Mann, M. E. (2004) On smoothing potentially non-stationary climate time series. *Geophysical Research Letters* **31**.
- [39] LHeureux, M. L, Lee, S, & Lyon, B. (2013) Recent multidecadal strengthening of the walker circulation across the tropical pacific. *Nature Climate Change* **3**, 571–576.

- [40] Kosaka, Y & Xie, S.-P. (2013) Recent global-warming hiatus tied to equatorial pacific surface cooling. *Nature* **501**, 403–407.
- [41] Allen, M. R & Ingram, W. J. (2002) Constraints on future changes in climate and the hydrologic cycle. *Nature* **419**, 224–232.
- [42] Held, I. M & Soden, B. J. (2006) Robust responses of the hydrological cycle to global warming. *Journal of Climate* **19**, 5686–5699.
- [43] Allen, M. R & Tett, S. F. (1999) Checking for model consistency in optimal fingerprinting. *Climate Dynamics* **15**, 419–434.
- [44] Santer, B, Mears, C, Doutriaux, C, Caldwell, P, Gleckler, P, Wigley, T, Solomon, S, Gillett, N, Ivanova, D, Karl, T, et al. (2011) Separating signal and noise in atmospheric temperature changes: The importance of timescale. *Journal of Geophysical Research: Atmospheres (1984–2012)* **116**.
